# Supplementary material for: Rhein Inhibits Autophagy in Rat Renal Tubular Cells by Regulation of AMPK/mTOR Signaling
Source: PubMed Central journal article supplement (PMC5333140; doi:10.1038/srep43790), 2017-03-02
Supplement: srep43790-s1.pdf [file srep43790-s1.pdf]

1 **Rhein Inhibits Autophagy in Rat Renal Tubular Cells by Regulation of**  
2 **AMPK/mTOR Signaling**

3 Yue Tu<sup>1,2,7</sup>, Liubao Gu<sup>3,7</sup>, Diping Chen<sup>2</sup>, Wei Wu<sup>4</sup>, Hong Liu<sup>5</sup>, Hao Hu<sup>6</sup>, Yigang Wan<sup>4</sup> &  
4 Wei Sun<sup>1</sup>

5 <sup>1</sup>Department of Nephrology, The Affiliated Hospital of Nanjing University of Chinese  
6 Medicine, Nanjing, China; <sup>2</sup>Department of Regimens in Chinese Medicine, Second Clinic  
7 Medical School, Nanjing University of Chinese Medicine, Nanjing, China; <sup>3</sup>Center for  
8 Diabetes Care, Education and Research, Jiangsu Province Institute of Geriatrics, Nanjing,  
9 China; <sup>4</sup>Department of Traditional Chinese Medicine, Nanjing Drum Tower Hospital, The  
10 Affiliated Hospital of Nanjing University Medical School, Nanjing, China; <sup>5</sup>First Clinic  
11 Medical School, Nanjing University of Chinese Medicine, Nanjing, China; <sup>6</sup>Department of  
12 Nephrology, Huanggang Hospital of Traditional Chinese Medicine, Huanggang, China. <sup>7</sup>

13 These authors contributed equally to this work.

14

15 Correspondence and requests for materials should be addressed to or Y.W. (email:  
16 [wyg68918@sina.com](mailto:wyg68918@sina.com)) or W.S. (email: [381968515@qq.com](mailto:381968515@qq.com))

17

18 Running title: Rhein Inhibits Autophagy in Renal Tubular Cells

19

20

A

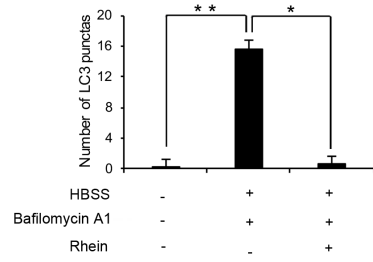

B

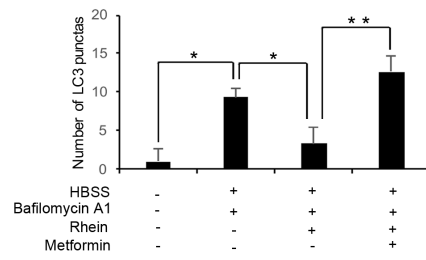

21

22 **Figure S1. Quantification of LC3 punctas.** (A) Quantification of LC3 punctas, Related to Figure

23 2E. (B) Quantification of LC3 punctas, Related to Figure 4F. Data are expressed as mean  $\pm$  SD, \*

24  $P < 0.05$ , \*\*  $P < 0.01$ .
